# Supplementary material for: Electronic structure modulation of NiS2 by transition metal doping for accelerating the hydrogen evolution reaction
Source: Royal Society of Chemistry journal article supplement (doi:10.1039/c8ta11286j), 2019-01-01
Supplement: c8ta11286j1.pdf [file c8ta11286j1.pdf]

## Supporting Information

### **Electronic structures modulation of NiS<sub>2</sub> by transition metal doping for accelerating hydrogen evolution reaction**

Tongtong Wang,<sup>a</sup> Xiaosong Guo,<sup>b</sup> Jingyan Zhang,<sup>a</sup> Wen Xiao,<sup>c</sup> Pinxian Xi,<sup>d</sup> Shanglong  
Peng<sup>a</sup> and Daqiang Gao<sup>a\*</sup>

<sup>a</sup>Key Laboratory for Magnetism and Magnetic Materials of MOE, Key Laboratory of  
Special Function Materials and Structure Design of MOE, Lanzhou University, Lanzhou  
730000, P. R. China

<sup>b</sup>College of Materials Science and Engineering, Qingdao University of Science and  
Technology, Qingdao 266061, Shandong, China

<sup>c</sup>Department of Material Science and Engineering, National University of Singapore,  
Engineering Drive 3, 117575, Singapore

<sup>d</sup>Key Laboratory of Nonferrous Metal Chemistry and Resources Utilization of Gansu  
Province and the Research Center of Biomedical Nanotechnology, Lanzhou University,  
Lanzhou, 730000, P. R. China

\*Email: gaodq@lzu.edu.cn

### $\Delta G_{H^*}$ calculations.

In order to reveal the Gibbs free energy ( $\Delta G_{H^*}$ ), which equals to the energy of hydrogen adsorption on the catalyst surface, a surface was cleaved from the crystal and a vacuum space of 15 Å was introduced to avoid interaction between adjacent surfaces. The total hydrogen evolution reaction can be written as  $H^+ + e^- \rightarrow 1/2 H_2$ . The  $\Delta G_{H^*}$  is calculated as  $\Delta G_{H^*} = \Delta E_H + \Delta E_{ZPE} - T\Delta S_H$ , where  $\Delta E_H$  is the hydrogen chemisorption energy per atom ( $\Delta E_H = E_{(surf + H)} - E_{(surf)} - 1/2 E_{H_2}$ ).  $E_{(surf + H)}$  and  $E_{(surf)}$  are the total energy of the surface model with and without H adsorption, respectively.  $E_{H_2}$  is the energy of a single  $H_2$  molecule isolated in a vacuum.  $\Delta E_{ZPE}$  is the difference between the zero-point energy of the adsorbed hydrogen and that of the gas phase hydrogen, which can be obtained from vibrational frequency calculation as implemented in VASP.  $T\Delta S_H \cong -1/2 S_0$ , where  $S_0$  is the entropy of  $H_2$  in the gas phase at standard conditions.<sup>1</sup>  $T\Delta S_H$  is estimated to be 0.2 eV to consider the entropy change at room temperature. In this work,  $\Delta G_{H^*}$  of the Ni and dopants sites on (001), (110) and (111) surfaces were calculated. For transition metal doped  $NiS_2$ , we used one dopant atom to replace one Ni atom at the surface when calculating the H absorption free energy.

### Turnover frequency calculations.

In order to know turnover frequency (TOF), we need to calculate electrochemical active surface firstly. Electrochemical capacitance measurements were used to determine the active surface area of each catalyst. We have obtained the electrochemical capacitance value by the cyclic voltammograms for pure  $NiSe_2$  and Fe doped  $NiSe_2$  catalysts. The specific capacitance can be converted into an electrochemical active surface area (ECSA) using the specific capacitance value for a flat standard with 0.071  $cm^2$  of real surface area. The specific capacitance for a flat surface is generally found to be in the range of 20-60  $\mu F/cm^2$ .<sup>2, 3</sup> In the following calculations of TOF, we assume 40  $\mu F/cm^2$ .

The electrochemical active surface area can be calculated.

$$A_{ECSA}^{Fe} = \frac{\text{Electrochemical capacitance of Fe}}{40 \mu F cm^{-2} \text{ per } cm_{ECSA}^2}$$

We calculate the per-site turnover frequency (TOF) via the following formula:

$$TOF = \frac{\# \text{total hydrogen turn over } / cm^2 \text{ geometric area}}{\# \text{surface sites } / cm^2 \text{ geometric area}}$$

The total number of hydrogen turn overs was calculated from the current density according to:

$$\begin{aligned} \#H_2 &= \left( j \frac{mA}{cm^2} \right) \left( \frac{1 C s^{-1}}{1000 mA} \right) \left( \frac{1 mol e^-}{96485.3 C} \right) \left( \frac{1 mol H_2}{2 mol e^-} \right) \left( \frac{6.022 \times 10^{23} H_2 \text{ molecules}}{1 mol H_2} \right) \\ &= 3.12 \times 10^{15} \frac{H_2/s}{cm^2} \text{ per } \frac{mA}{cm^2} \end{aligned}$$

Since the exact hydrogen binding sites are not known, we conservatively estimate the number of active sites as the total number of surface sites (including both the transition metal and Ni atoms as possible active sites) from the roughness factor together with the

unit cell of the Fe doped NiS<sub>2</sub>.

# surface sites per real surface area (here calculated for NiS<sub>2</sub>):

$$\#surface\ sites = \left( \frac{4 \frac{atoms}{unit\ cell}}{170.89 \text{ \AA}^3 \frac{cell}{unit}} \right)^{\frac{2}{3}} = 7.1827 \times 10^{14} atoms\ cm^{-2}$$

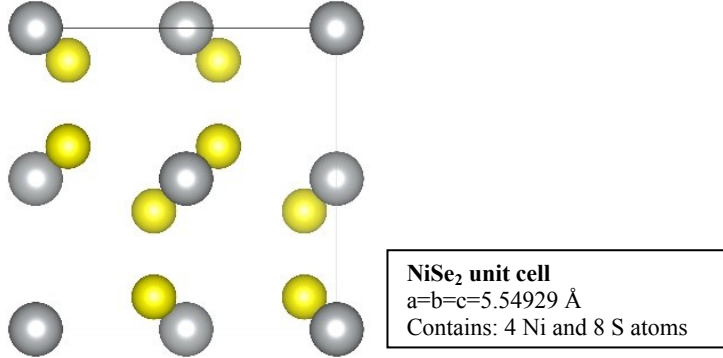

Figure S1. NiS<sub>2</sub> unit cell. Ni: gray and S atoms: yellow.

Finally, the plot of current density can be converted into a TOF plot according to:

$$TOF = \frac{(3.12 \times 10^{15} \frac{H_2/s}{cm^2} per \frac{mA}{cm^2}) \times |j|}{\#surface\ sites \times A_{ESCA}^{Fe}}$$

Where j is current density obtained from the polarization curve,  $A_{ESCA}^{Fe}$  has been calculated above.

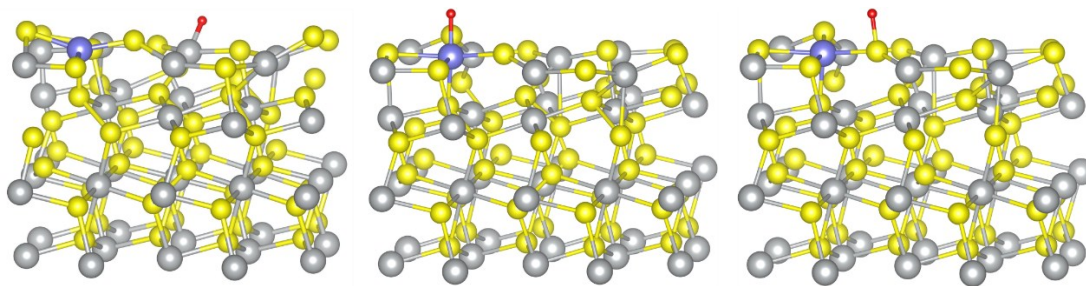

**Figure S1.** The optimized structures of Fe-doped  $\text{NiS}_2$  (100) surface with H adsorbed on the Fe, Ni, and S sites. The gray, yellow, violet and red balls represent Ni, S, Fe and H atoms, respectively.

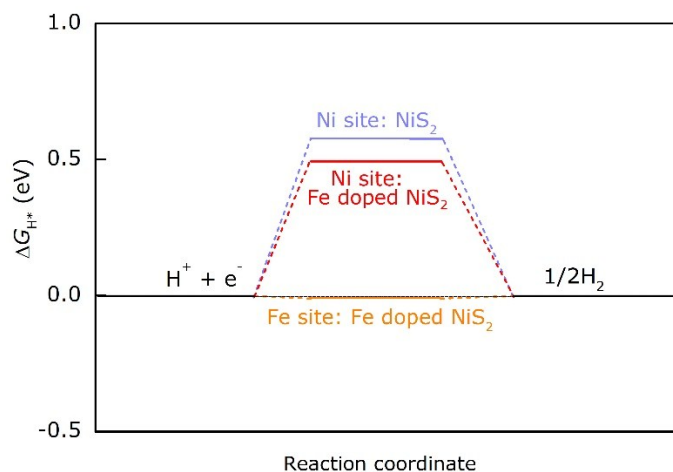

**Figure S2.** The diagram of  $\Delta G_{\text{H}^*}$  at Fe and Ni sites on the (110) surface of  $\text{NiS}_2$  and Fe-doped  $\text{NiS}_2$ .

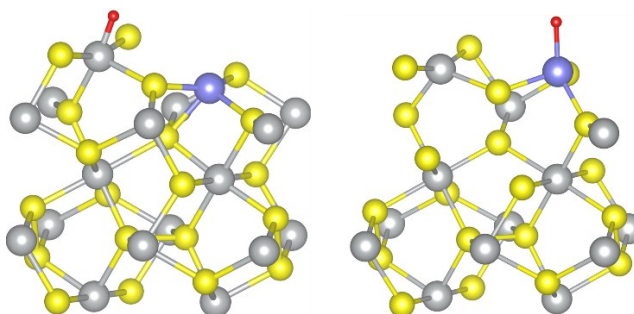

**Figure S3.** The optimized structures of Fe-doped  $\text{NiS}_2$  (110) surface with H adsorbed on

the Fe and Ni sites. The gray, yellow, violet and red balls represent Ni, S, Fe and H atoms, respectively.

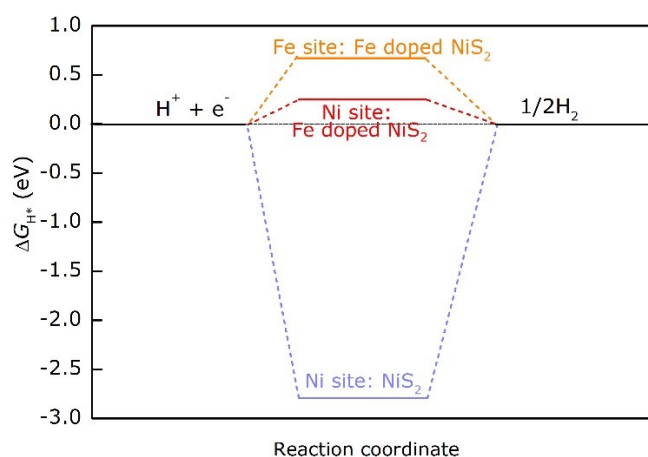

**Figure S4.** The diagram of  $\Delta G_{H^*}$  at Fe and Ni sites on the (111) surface of  $\text{NiS}_2$  and Fe-doped  $\text{NiS}_2$ .

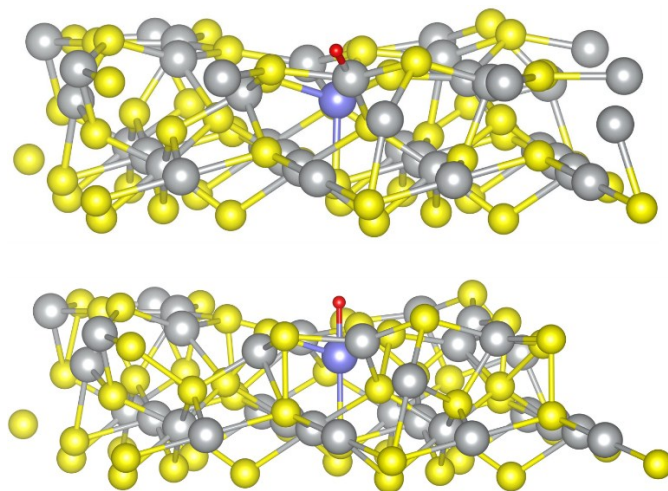

**Figure S5.** The optimized structures of Fe-doped  $\text{NiS}_2$  (111) surface with H adsorbed on the Fe and Ni sites. The gray, yellow, violet and red balls represent Ni, S, Fe and H atoms, respectively.

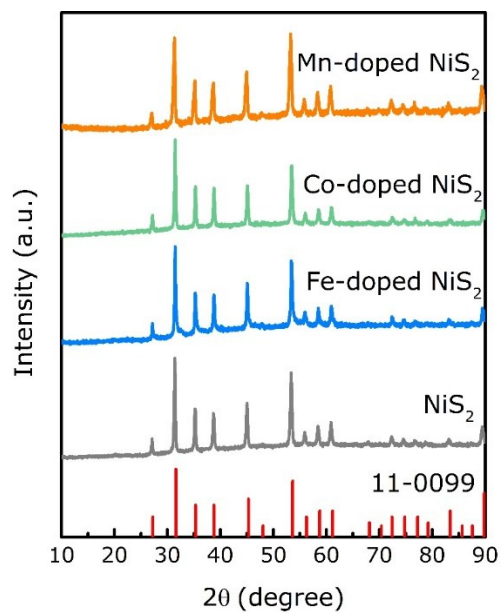

**Figure S6.** XRD patterns of bare NiS<sub>2</sub> and NiS<sub>2</sub> doped with Fe, Co, and Mn.

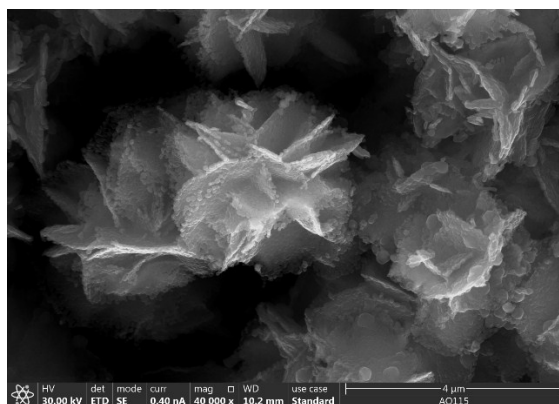

**Figure S7.** SEM image of Co-doped NiS<sub>2</sub>.

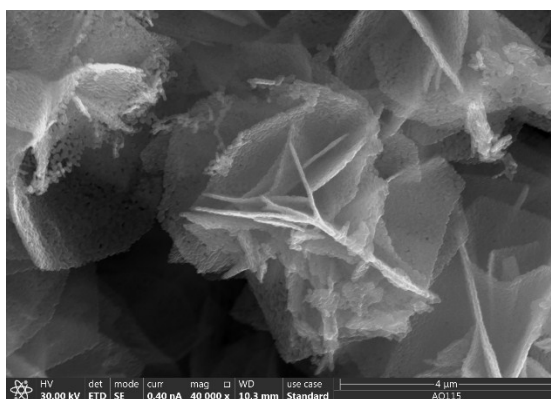

**Figure S8.** SEM image of Mn-doped NiS<sub>2</sub>.

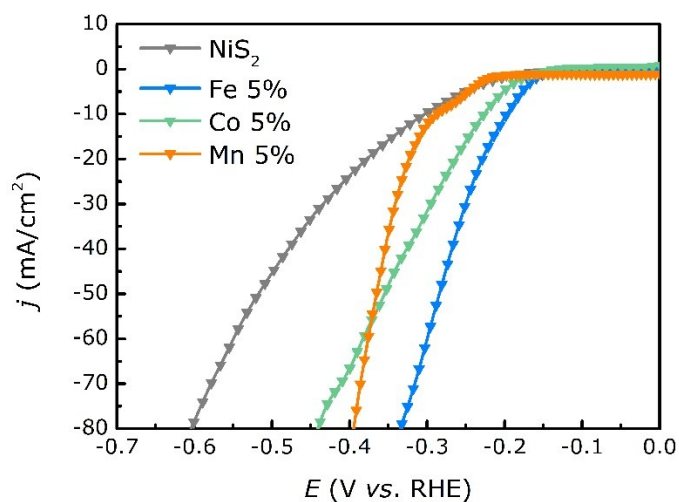

**Figure S9.** Linear sweep voltammetry curves of bare NiS<sub>2</sub> and NiS<sub>2</sub> doped with Fe, Co, and Mn.

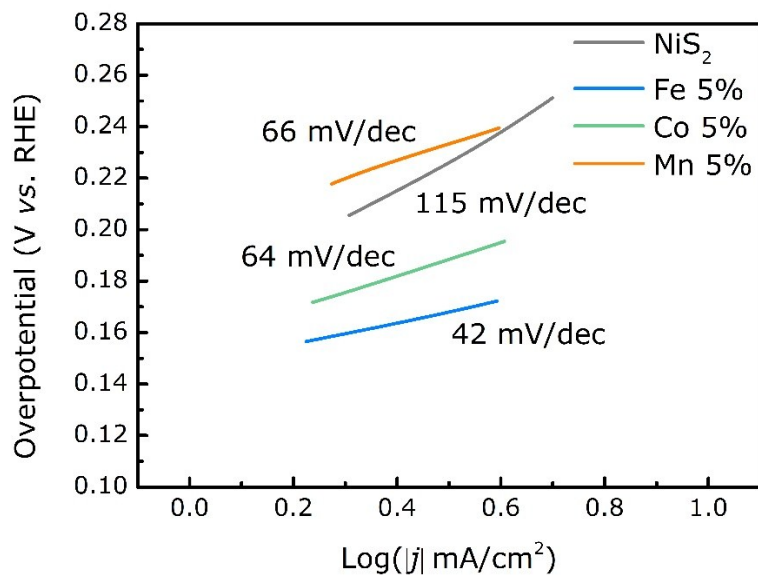

**Figure S10.** Tafel plots of bare NiS<sub>2</sub> and NiS<sub>2</sub> doped with Fe, Co, and Mn.

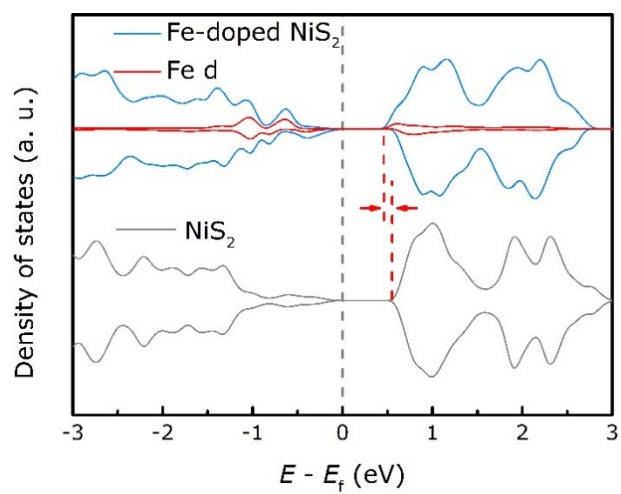

**Figure S11.** PDOS of Fe-doped  $\text{NiS}_2$ .

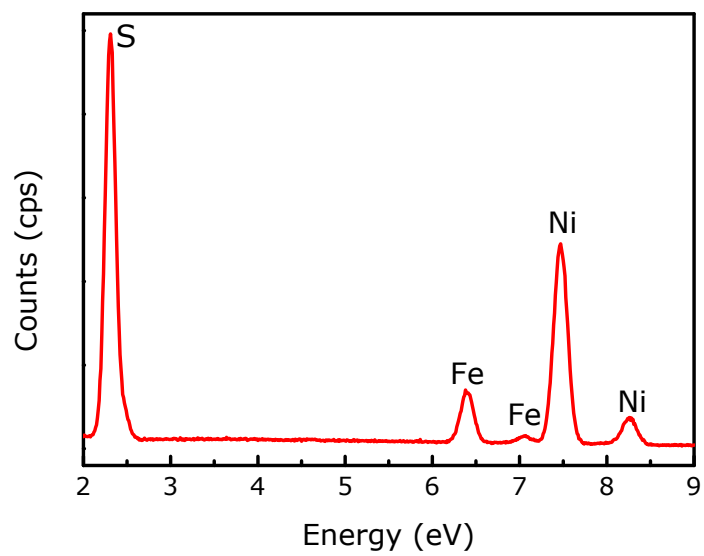

**Figure S12.** EDS spectrum of Fe-doped  $\text{NiS}_2$ .



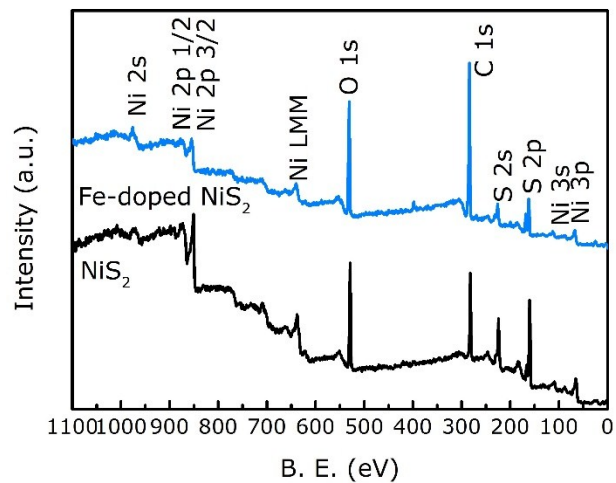

**Figure S13.** XPS survey spectrum of Fe-doped  $\text{NiS}_2$  and  $\text{NiS}_2$ .

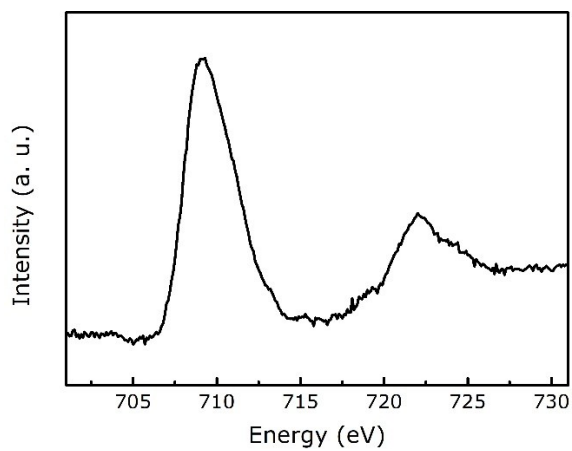

**Figure S14.** XAS curve of Fe L-edge of Fe-doped  $\text{NiS}_2$ .

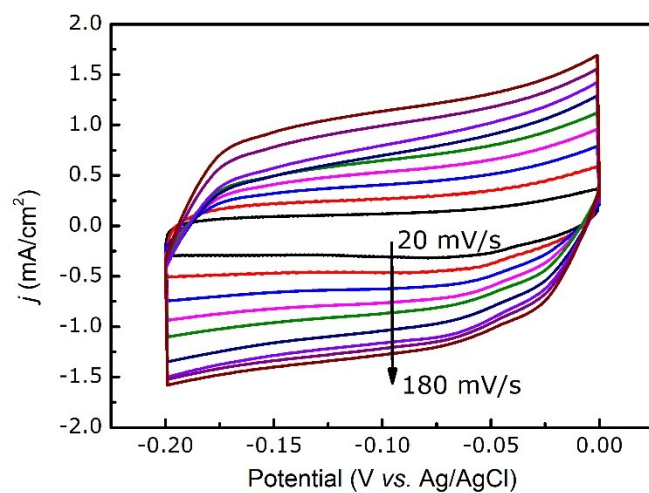

**Figure S15.** CV curves of  $\text{NiS}_2$ .

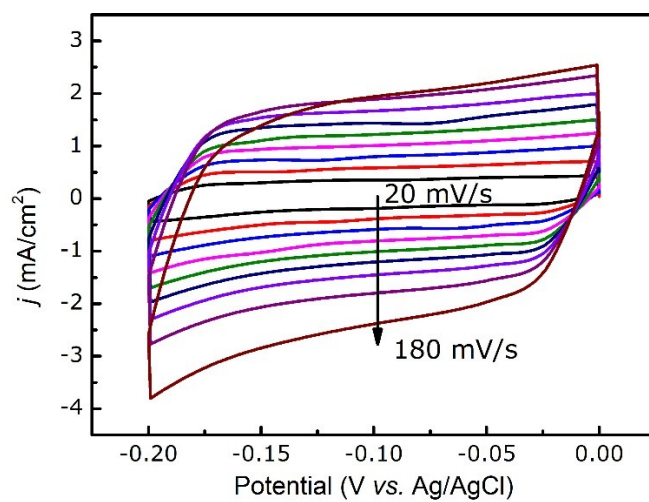

**Figure S16.** CV curves of Fe-doped  $\text{NiS}_2$ .

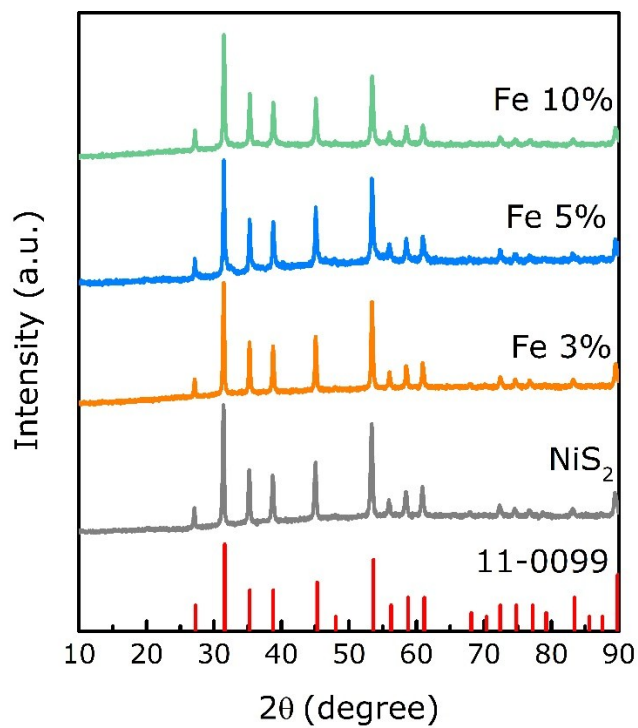

**Figure S17.** XRD patterns of  $\text{NiS}_2$  doped with Fe at different doping amounts.

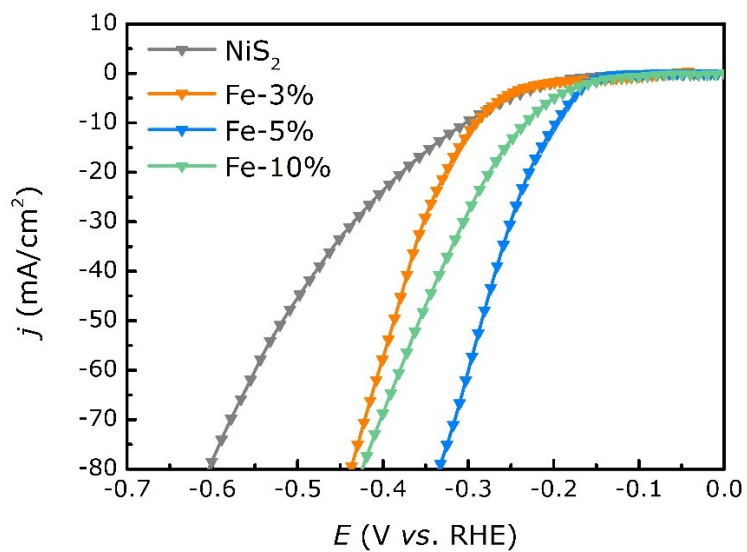

**Figure S18.** Linear sweep voltammetry curves of  $\text{NiS}_2$  doped with Fe at different doping amounts.

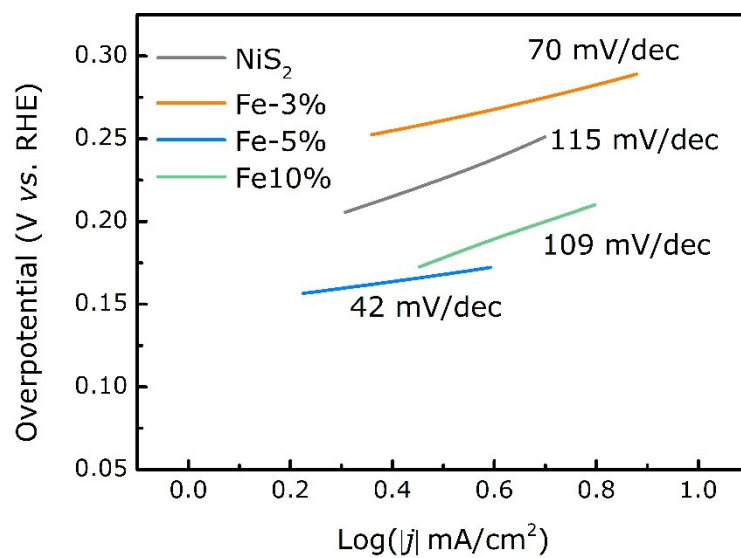

**Figure S19.** Tafel plots of NiS<sub>2</sub> doped with Fe at different doping amounts.

## References

1. J. K. Nørskov, T. Bligaard, A. Logadottir, J. R. Kitchin, J. G. Chen, S. Pandalov and U. Stimming, *J. Electrochem. Soc.*, 2005, **152**, J23.
2. B. E. Conway and B. V. Tilak, *Electrochim. Acta*, 2002, **47**, 3571-3594.
3. J. D. Benck, Z. Chen, L. Y. Kuritzky, A. J. Forman and T. F. Jaramillo, *ACS Catal.*, 2012, **2**, 1916-1923.
